# Supplementary material for: Polarity-induced dual room-temperature phosphorescence involving the T2 states of pure organic phosphors
Source: Royal Society of Chemistry journal article supplement (doi:10.1039/d2tc02152h), 2022-01-01
Supplement: d2tc02152h1.pdf [file d2tc02152h1.pdf]

## Supporting Information

### **Polarity-induced dual room-temperature phosphorescence involving the T<sub>2</sub> state of purely organic phosphors**

Lixin Zang,<sup>a,b</sup> Wenhao Shao,<sup>c</sup> Onas Bolton,<sup>a</sup> Ramin Ansari,<sup>d</sup> Seong Jun Yoon,<sup>a</sup> Jung-Moo Heo,<sup>a</sup>  
John Kieffer,<sup>a</sup> Adam J. Matzger,<sup>c,e</sup> Jinsang Kim<sup>a,b,d,e\*</sup>

<sup>a</sup>Department of Materials Science and Engineering, University of Michigan, Ann Arbor, MI 48109,  
United States

<sup>b</sup>College of Chemistry, Chemical Engineering and Materials Science, Shandong Normal  
University, Ji'nan, 250014, China

<sup>c</sup>Department of Chemistry, University of Michigan, Ann Arbor, MI 48109, United States.

<sup>d</sup>Department of Chemical Engineering, University of Michigan, Ann Arbor, MI 48109, United  
States.

<sup>e</sup>Macromolecular Science and Engineering, University of Michigan, Ann Arbor, MI 48109, United  
States.

\*Corresponding Author: Jinsang Kim, Email: \*Jinsang@umich.edu

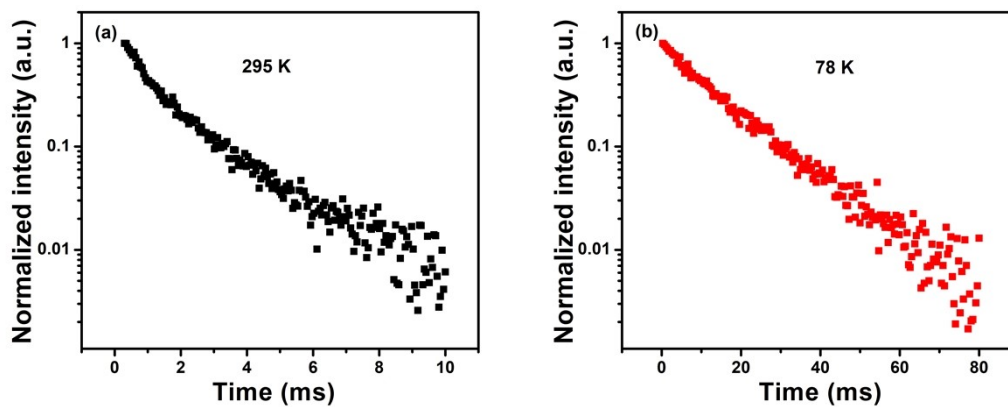

Figure S1. The decay curve of Br6A at (a) room temperature and (b) 78 K.

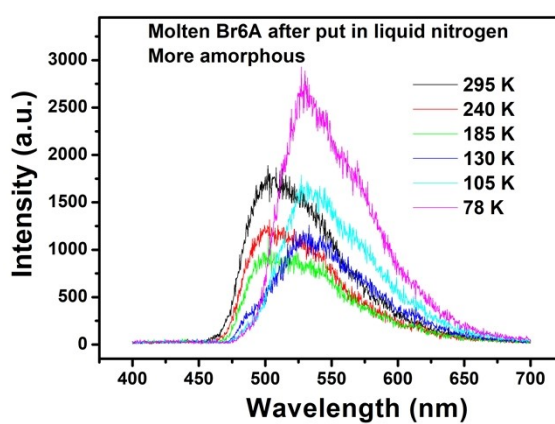

Figure S2. The emission spectra of molten Br6A at different temperatures.

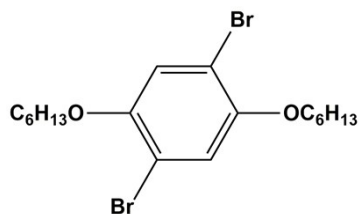

Figure S3. Chemical structure of Br6.

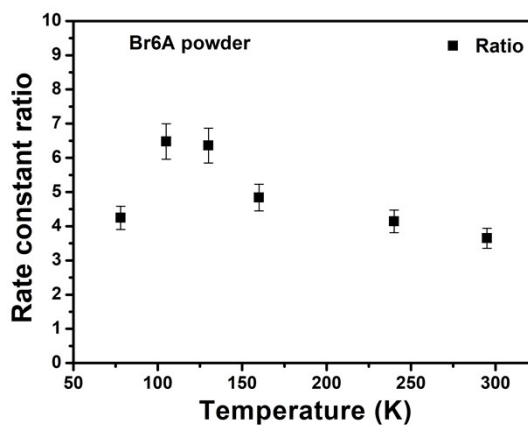

Figure S4. The ratio between the rate constant of the faster decay and that of the slower decay.
